# Supplementary material for: Synthesis of New 2-Arylbenzo[b]furan Derivatives via Palladium-Catalyzed Suzuki Cross-Coupling Reactions in Aqueous Media
Source: MDPI journal article supplement (doi:10.3390/molecules23102450), 2018-09-25

# Synthesis of New 2-Arylbenzo[b]furan Derivatives via Palladium-Catalyzed Suzuki Cross Coupling Reactions in Aqueous Media

## Supporting Information

Qianqian Chen, Panli Jiang, Mengping Guo\* and Jianxin Yang\*

<sup>1</sup> Hainan Provincial Fine Chemical Engineering Research Center, Laboratory of Green Catalysis and Reaction Engineering of Haikou, College of Chemistry and Chemical Engineering, Hainan University, 570228, China;

<sup>2</sup> Institute of Coordination Catalysis, College of Chemistry and Bio-Engineering, Yichun University, Yichun 336000, China;

## Characterization

1. <sup>1</sup>H-NMR, <sup>13</sup>C-NMR, HRMS and GC-MS of 2-(4'-Methoxy-biphenyl-4-yl)-benzofuran (solvent:chloroform-d)

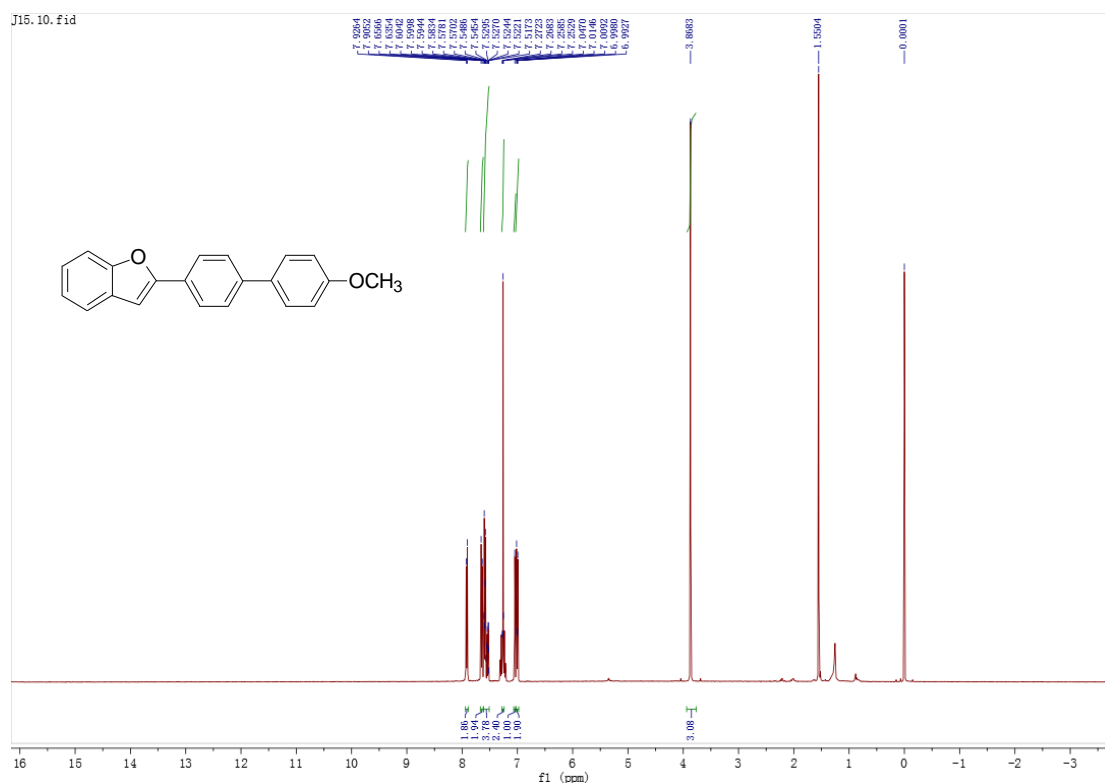

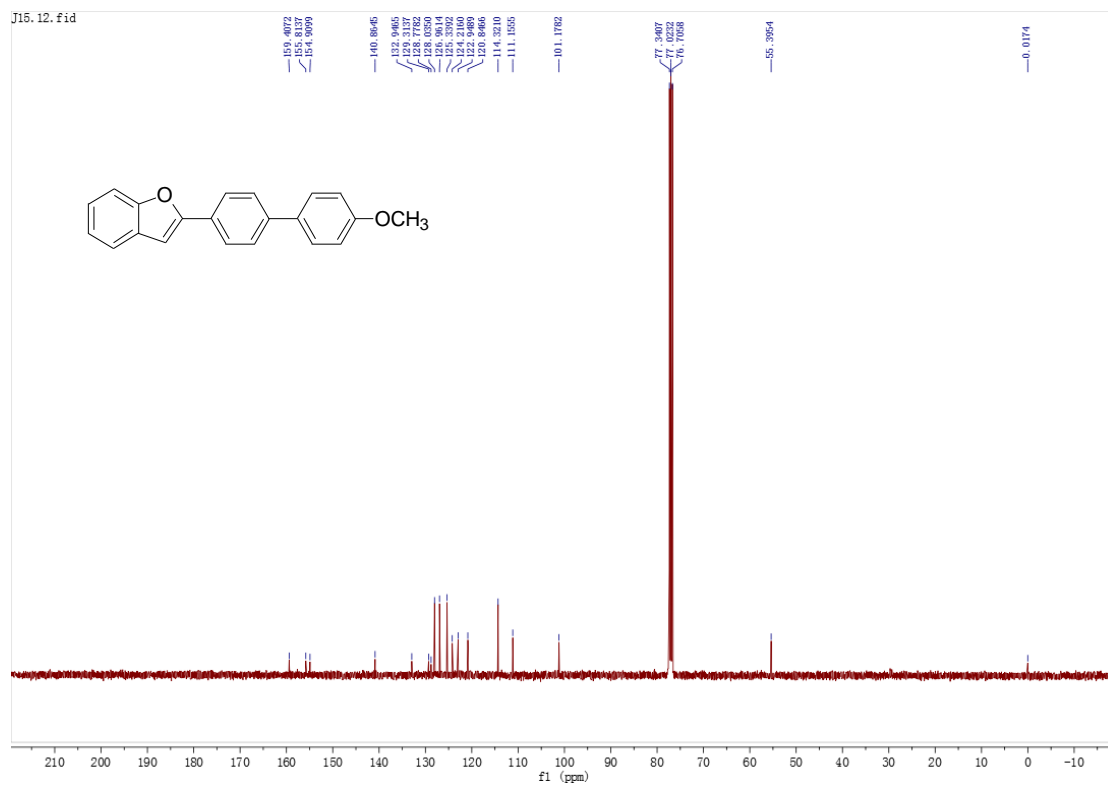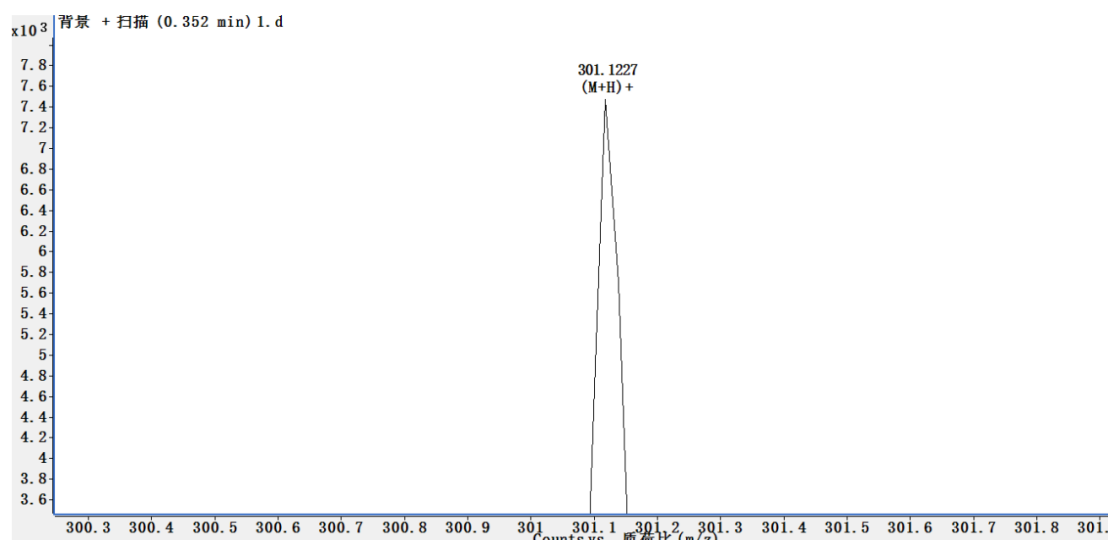





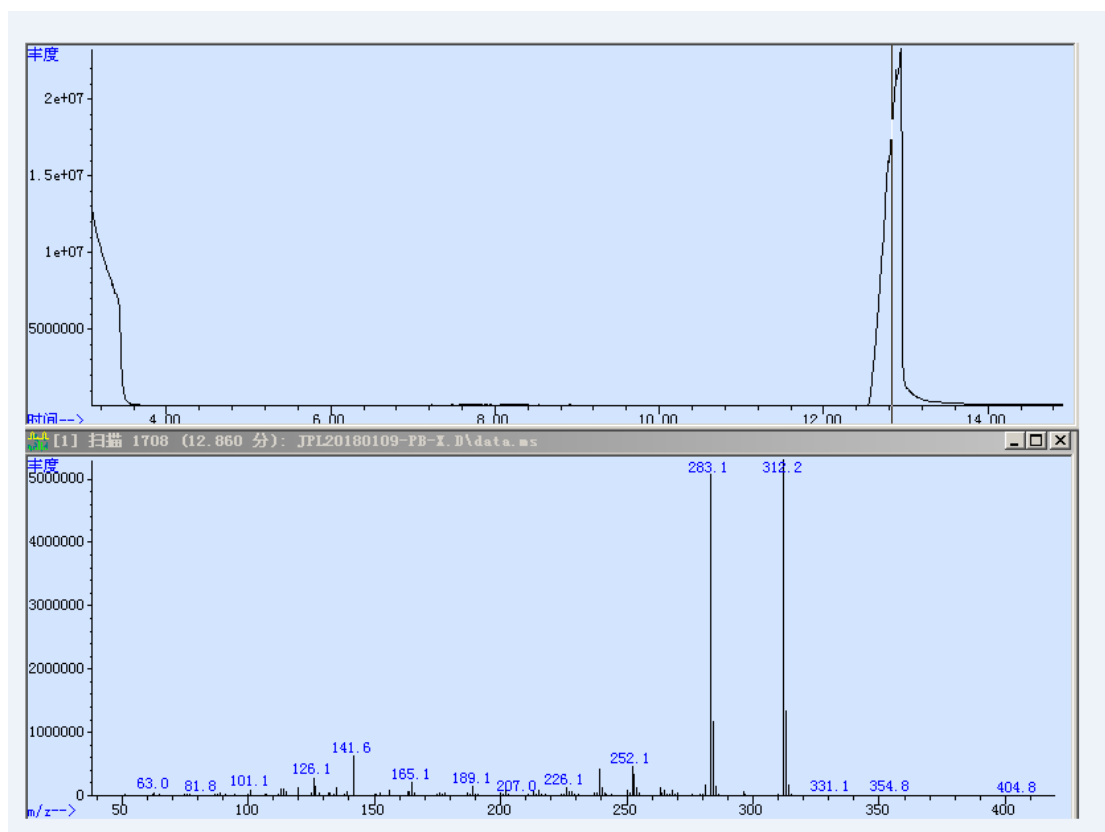

### 3. $^1\text{H}$ -NMR, $^{13}\text{C}$ -NMR, **HRMS** and **GC-MS** of 2-(4'-Propyl-biphenyl-4-yl)-benzofuran (**solvent:chloroform-d**)

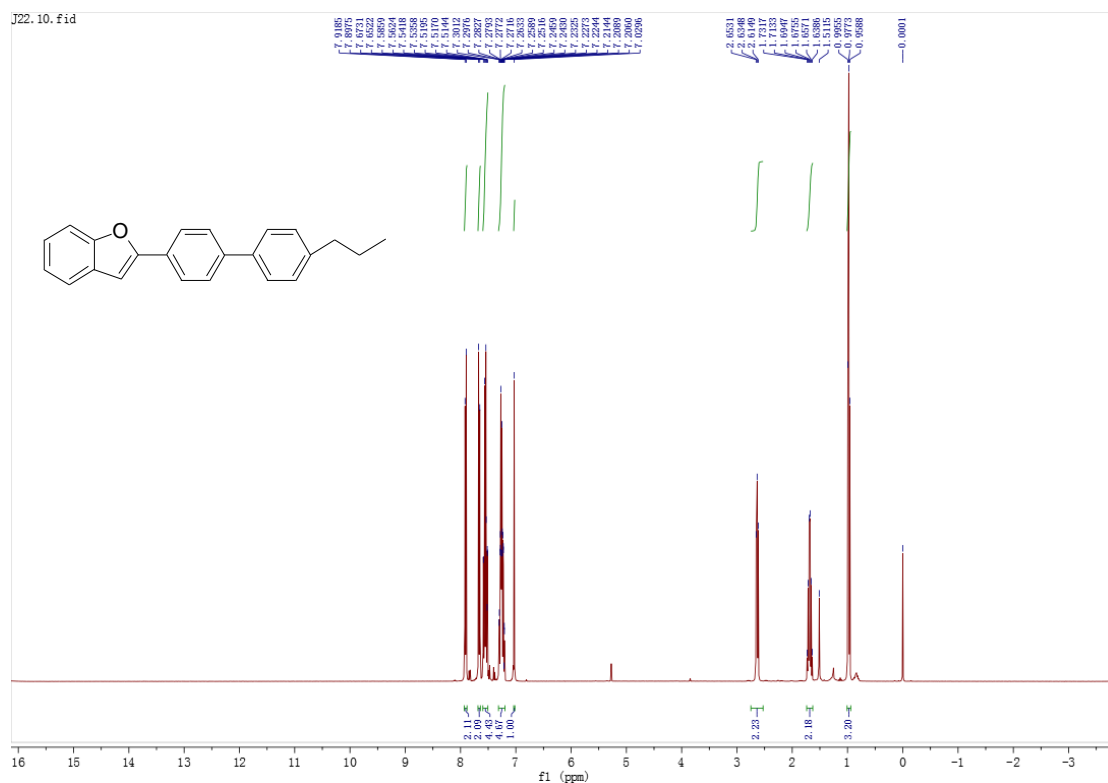

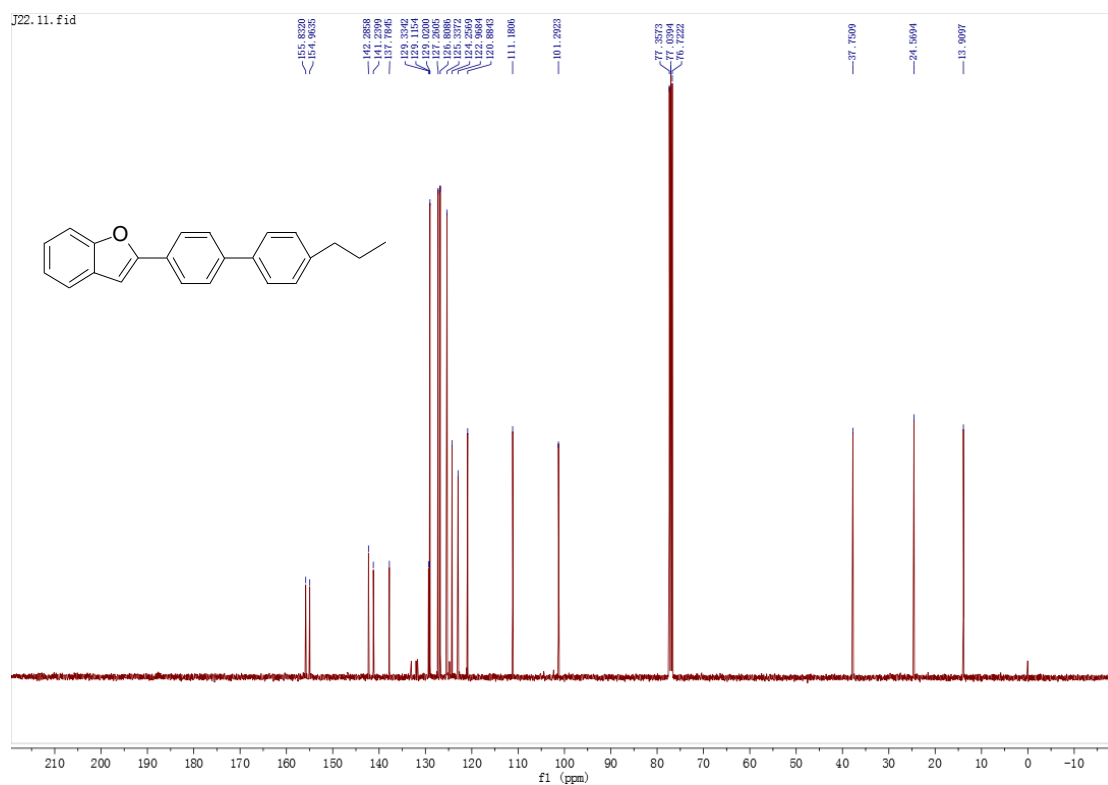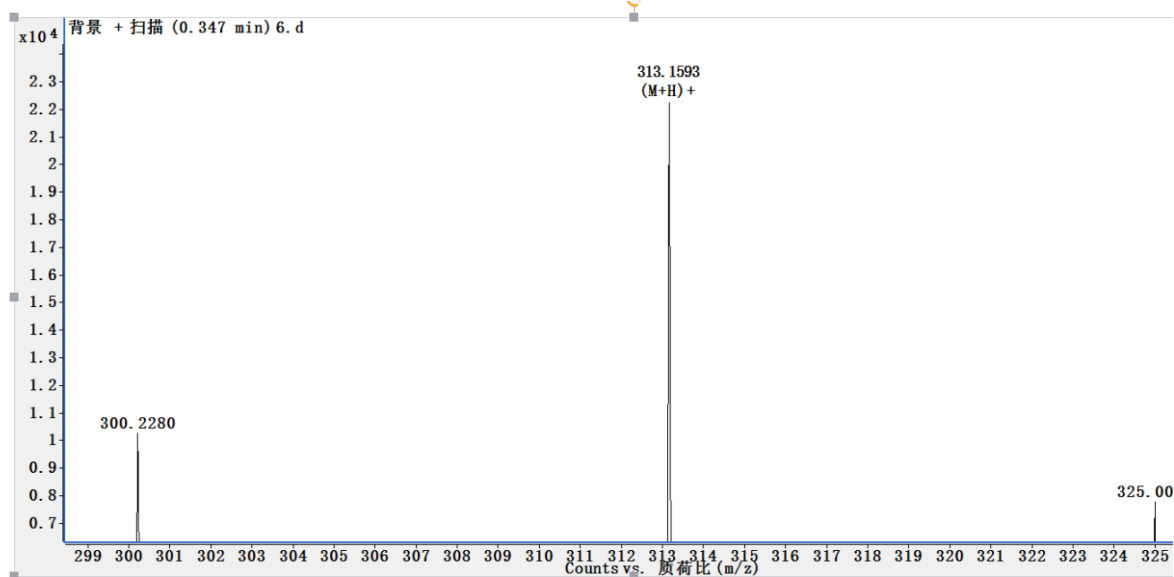

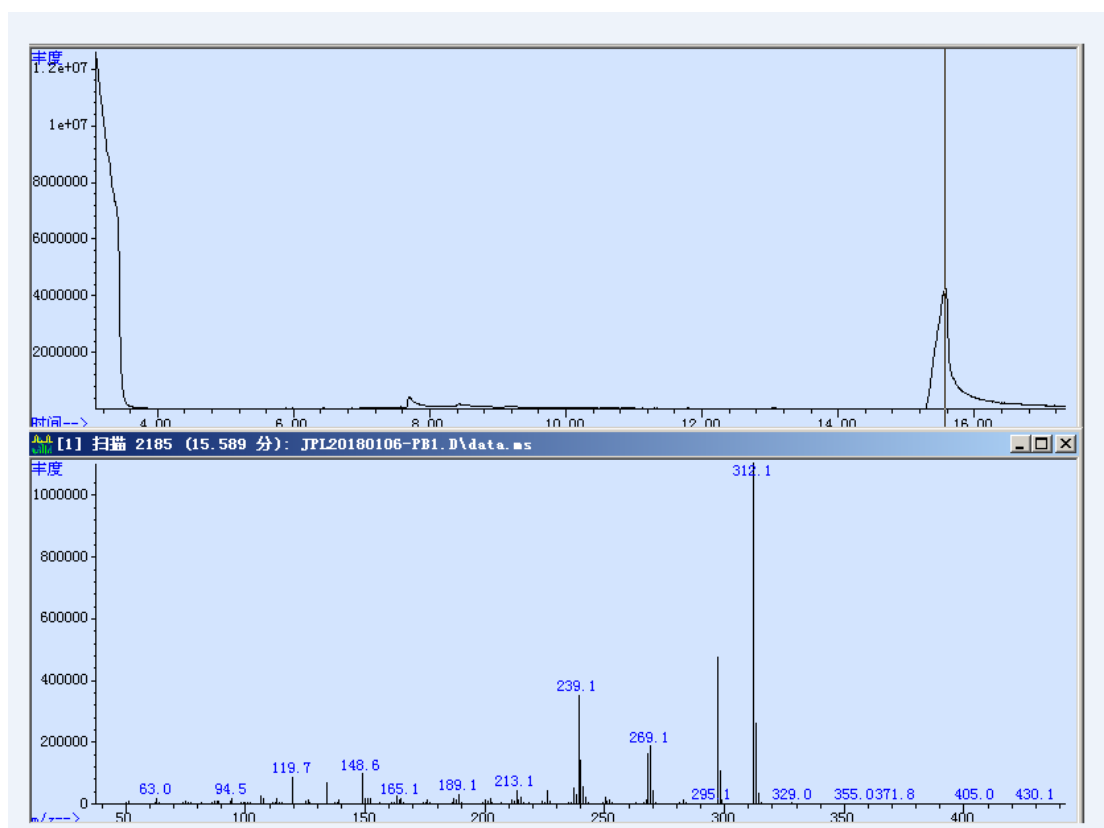

#### 4. $^1\text{H}$ -NMR, $^{13}\text{C}$ -NMR, HRMS and GC-MS of 2-(3'-Methyl-biphenyl-4-yl)-benzofuran (solvent:chloroform-d)

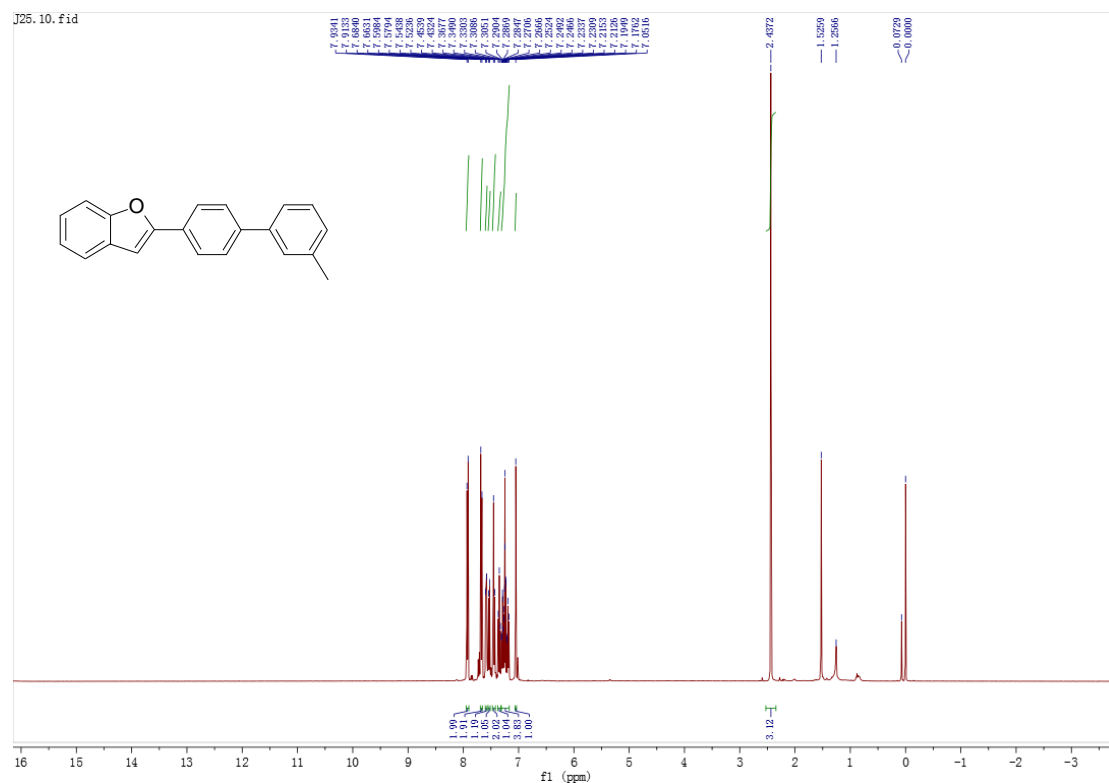

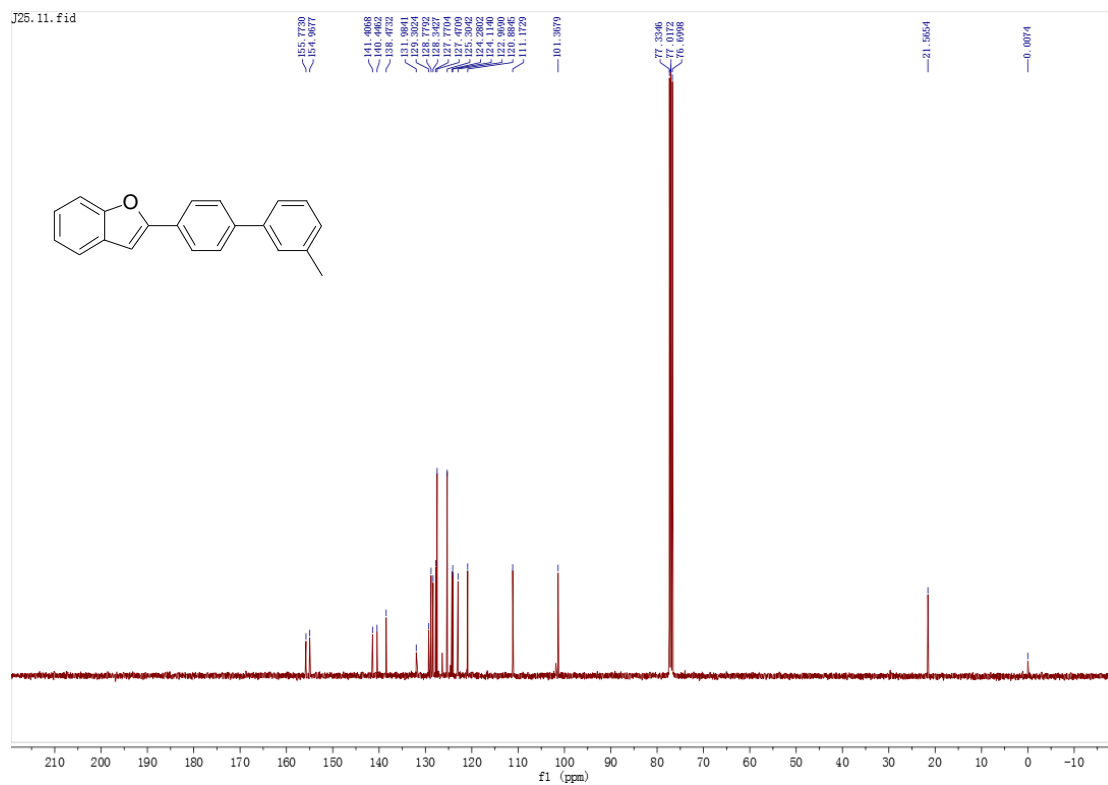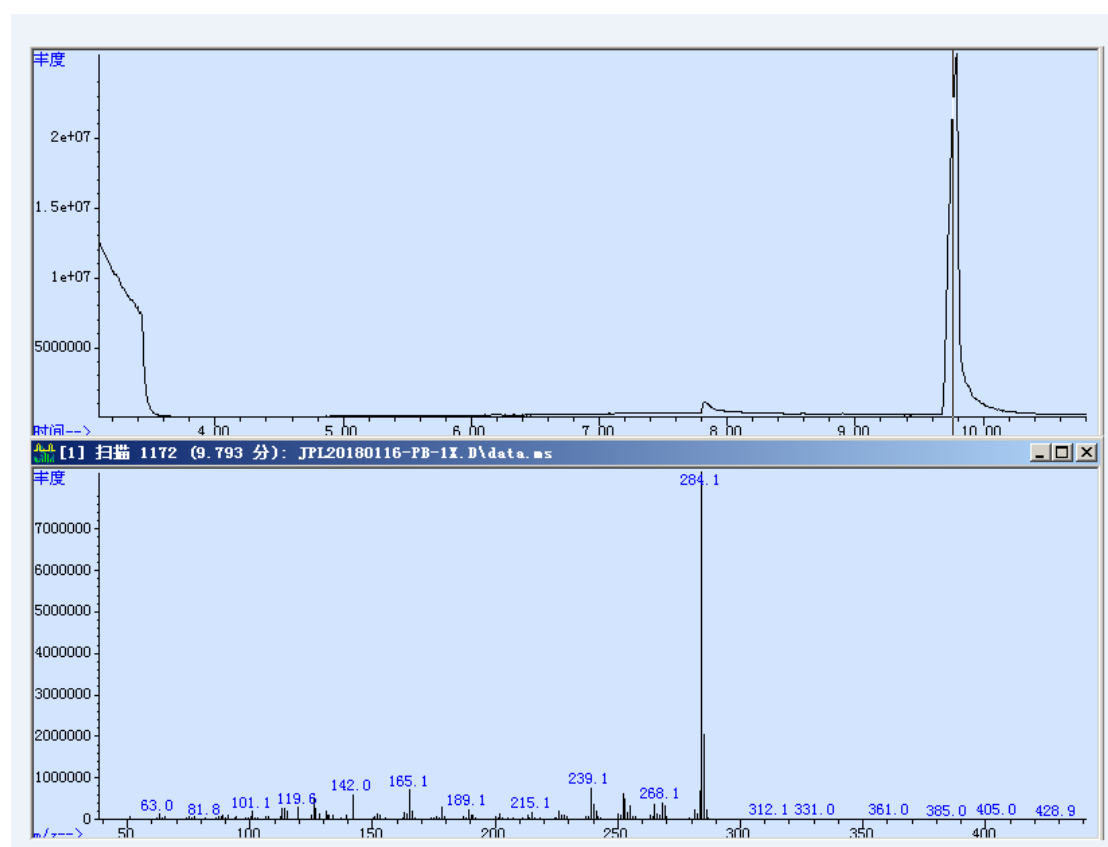



5.  $^1\text{H}$ -NMR,  $^{13}\text{C}$ -NMR, **HRMS**, **GC-MS** of  
**2-(2'-Methyl-biphenyl-4-yl)-benzofuran** (solvent:chloroform-d)

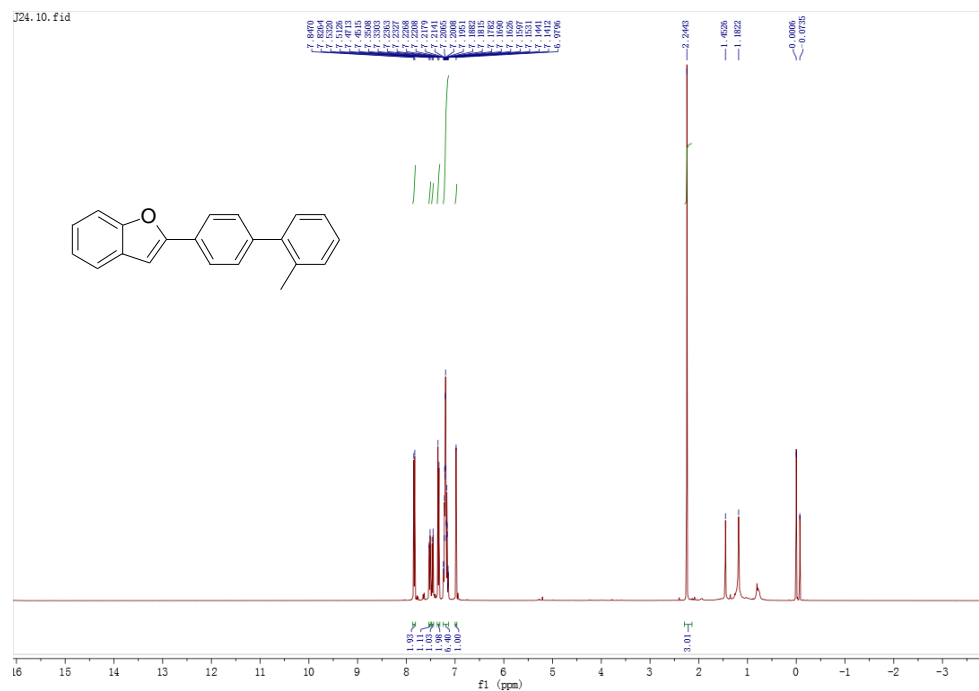

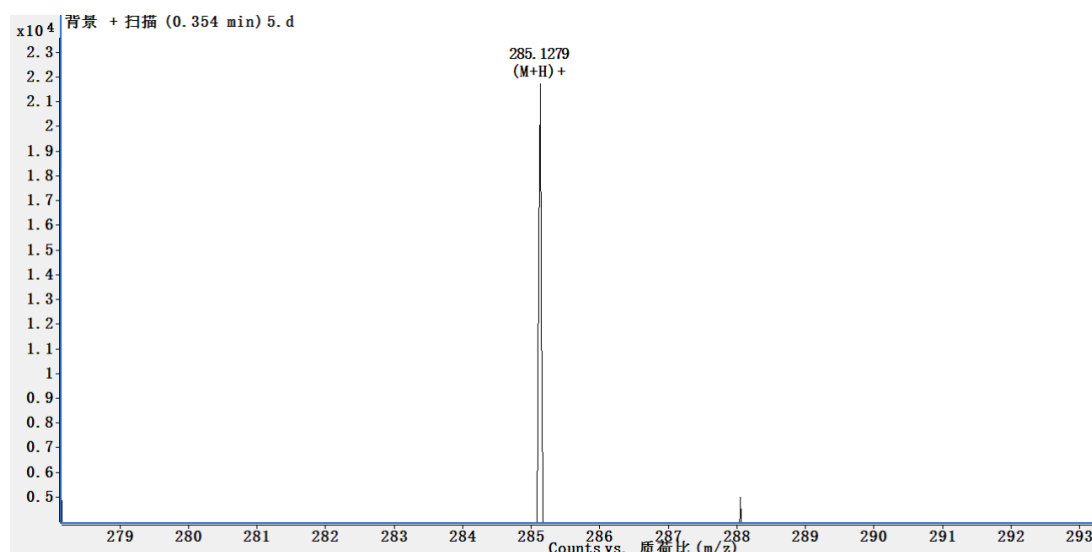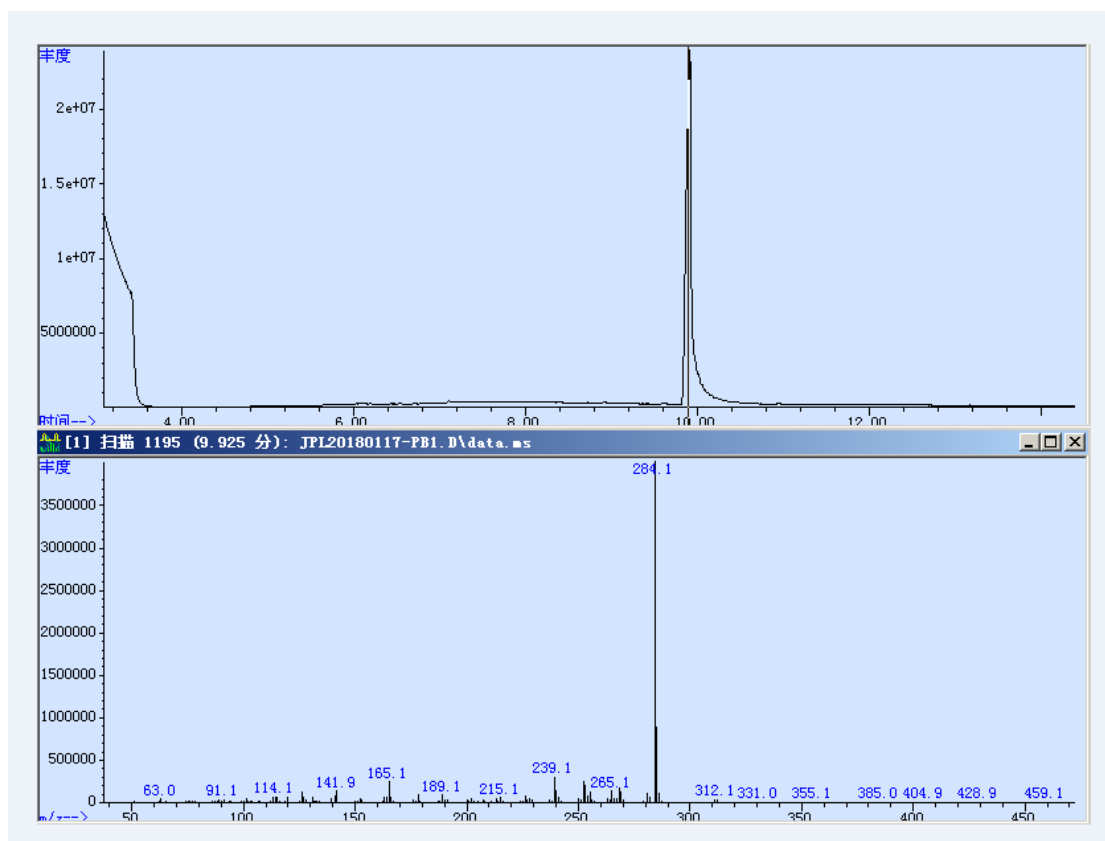

6. <sup>1</sup>H-NMR, <sup>13</sup>C-NMR, **HRMS**, **GC-MS** of  
2-(3',4'-Difluoro-biphenyl-4-yl)-benzofuran (solvent:chloroform-d)



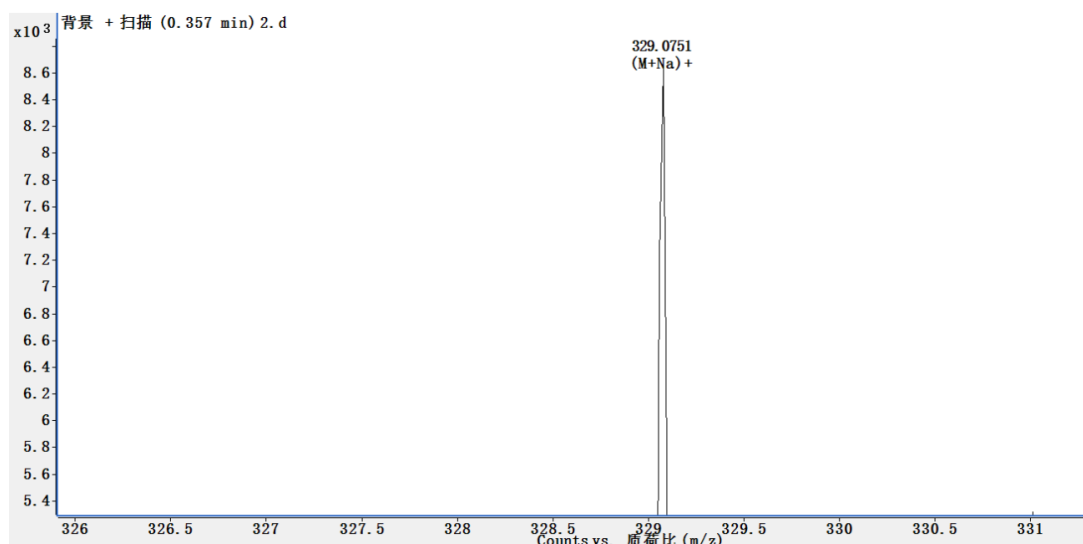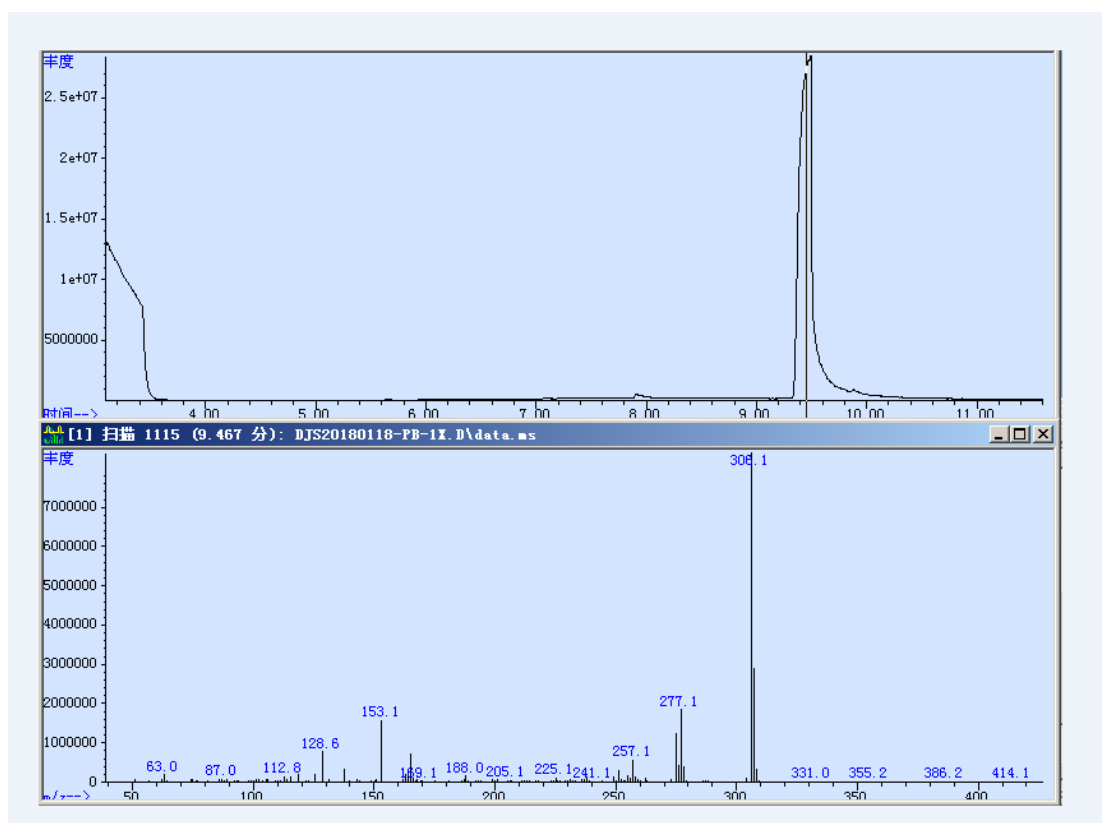

7.  $^1\text{H}$ -NMR,  $^{13}\text{C}$ -NMR, **HRMS** and **GC-MS** of  
2-(3',5'-Difluoro-biphenyl-4-yl)-benzofuran (**solvent:chloroform-d**)

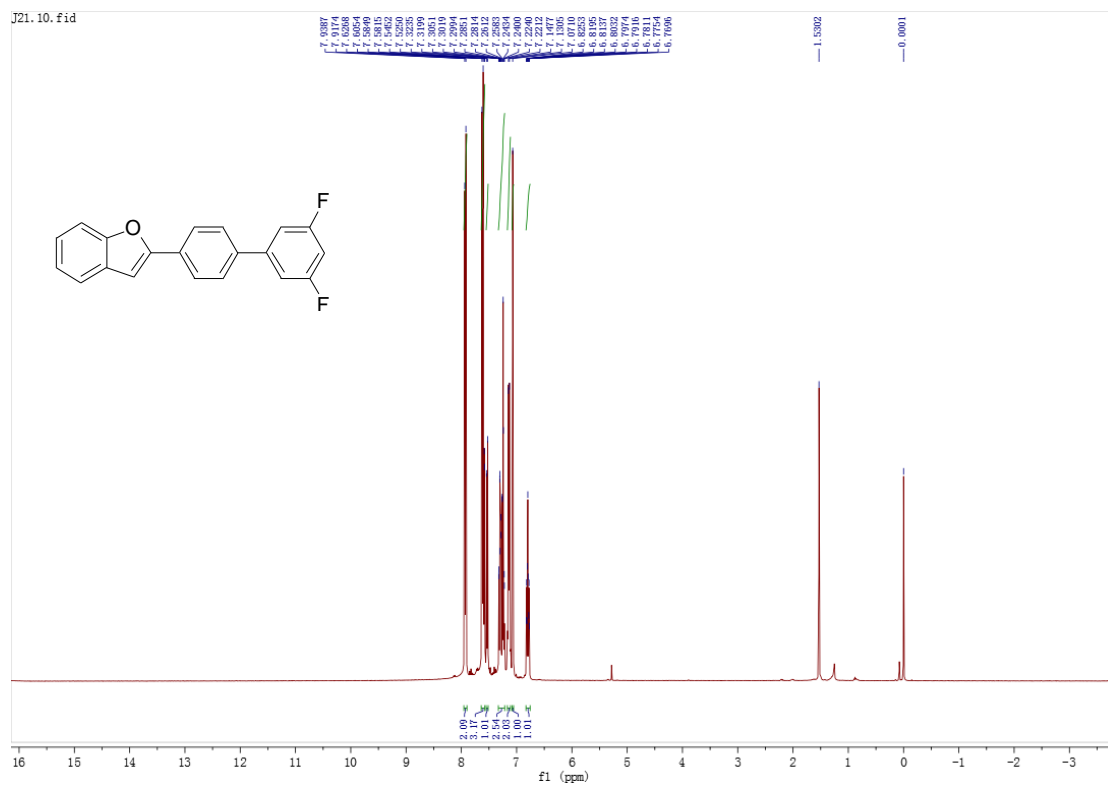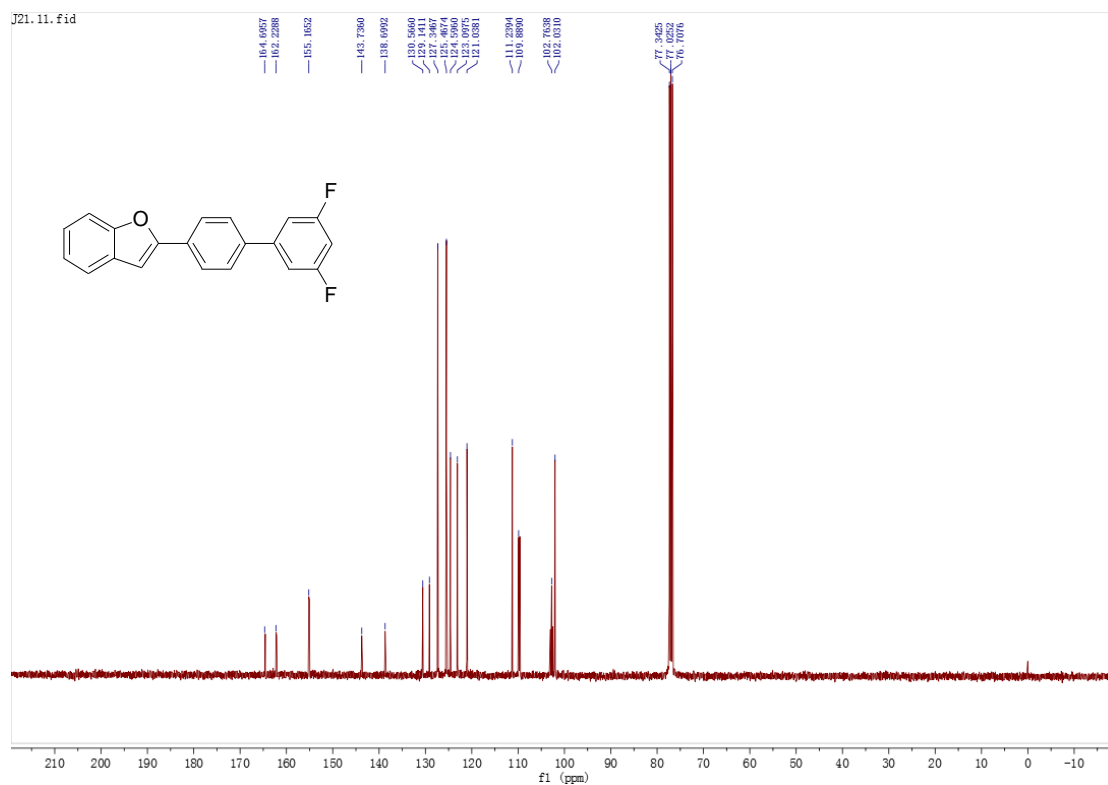

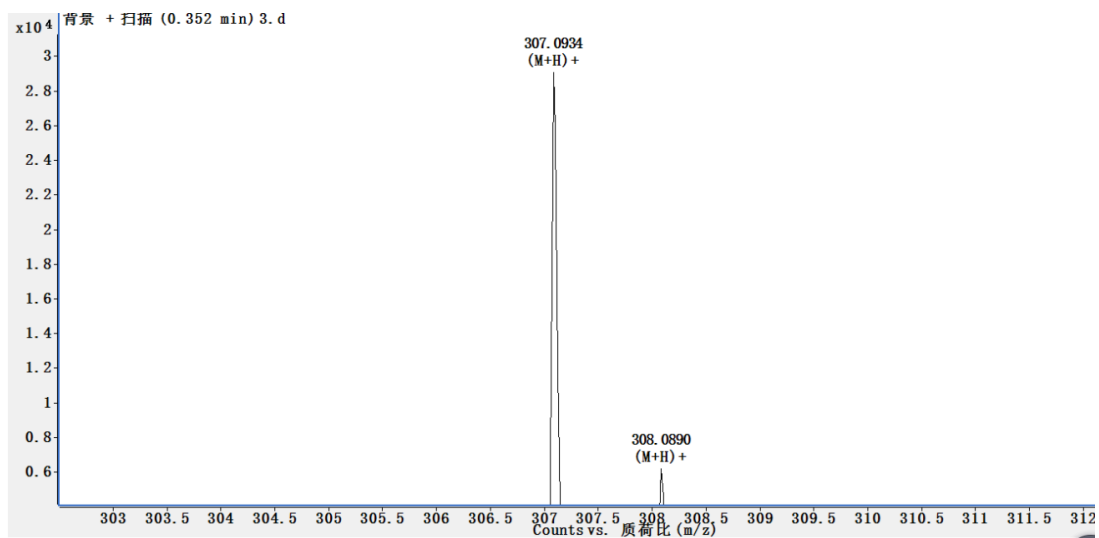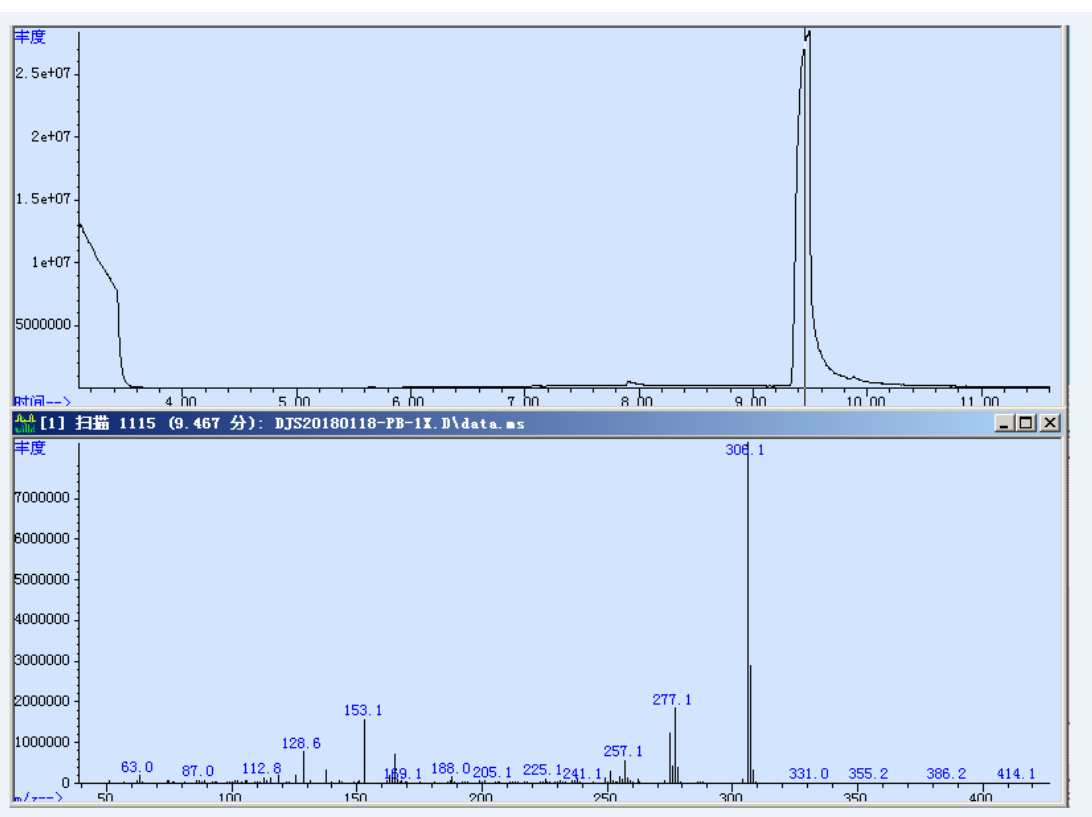

Supplement: s1 [file s1]
